# Supplementary material for: Long COVID at Different Altitudes: A Countrywide Epidemiological Analysis
Source: MDPI journal article supplement (doi:10.3390/ijerph192214673), 2022-11-08
Supplement: s1 [file s1]

**Supplementary file S1.** Demographic characteristics and history of participants with Long-COVID symptoms.

| Characteristics            |                                | n    | (%)           |
|----------------------------|--------------------------------|------|---------------|
| <b>Demographics</b>        |                                |      |               |
| Sex                        | Male                           | 396  | 36.0%         |
|                            | Female                         | 704  | 64.0%         |
|                            | Total                          | 1100 | 100.0%        |
| Age (years)                | 0 to 10                        | 1    | 0.1%          |
|                            | 10 to 20                       | 60   | 5.5%          |
|                            | 21 to 30                       | 382  | 34.7%         |
|                            | 31 to 40                       | 372  | 33.8%         |
|                            | 41 to 50                       | 191  | 17.4%         |
|                            | 51 to 60                       | 72   | 6.5%          |
|                            | 61 to 70                       | 15   | 1.4%          |
|                            | 71 to 80                       | 6    | 0.5%          |
|                            | 81 to 90                       | 1    | 0.1%          |
|                            | Total                          | 1100 | 100.0%        |
| Ethnicity                  | Mestizo                        | 1008 | 91.6%         |
|                            | White                          | 59   | 5.4%          |
|                            | Montubio                       | 15   | 1.4%          |
|                            | Indigenous                     | 8    | 0.7%          |
|                            | Afro descendants               | 6    | 0.5%          |
|                            | Other                          | 4    | 0.4%          |
|                            | Total                          | 1100 | 100.0%        |
| Marital status             | Single                         | 587  | 53.4%         |
|                            | Married                        | 405  | 36.8%         |
|                            | Divorced                       | 62   | 5.6%          |
|                            | Common-law                     | 41   | 3.7%          |
|                            | Widowed                        | 5    | 0.5%          |
|                            | Total                          | 1100 | 100.0%        |
| Residence altitude         | Above 2500 m.                  | 789  | 71.7%         |
|                            | Below 2500 m.                  | 311  | 28.3%         |
|                            | Total                          | 1100 | 100.0%        |
| Occupation                 | Health care workers            | 238  | 21.6%         |
|                            | Indoor workers                 | 291  | 26.5%         |
|                            | Outdoor workers                | 14   | 1.3%          |
|                            | Workers in contact with people | 324  | 29.5%         |
|                            | Students                       | 184  | 16.7%         |
|                            | Unemployment and retired       | 49   | 4.5%          |
|                            | Total                          | 1100 | 100.0%        |
| Weight (kg)*               |                                | 66   | (47 - 85)     |
| Height (cm)*               |                                | 163  | (151 - 175)   |
| BMI (kg/cm <sup>2</sup> )* |                                | 24.8 | (19.4 - 30.2) |
| BMI (kg/cm <sup>2</sup> )  | Underweight (< 18.5)           | 29   | 2.5%          |
|                            | Normal (18.5 - 24.9)           | 544  | 49.5%         |
|                            | Overweight (25.0 - 29.9)       | 369  | 33.6%         |
|                            | Obesity (> 30.0)               | 158  | 14.4%         |
|                            | Total                          | 1100 | 100.0%        |

**Personal history**

|                                   |                                           |      |        |
|-----------------------------------|-------------------------------------------|------|--------|
| Comorbidities history             | Yes                                       | 247  | 22.5%  |
|                                   | No                                        | 853  | 77.5%  |
|                                   | Total                                     | 1100 | 100.0% |
| Comorbidities                     | Arterial hypertension                     | 66   | 25.1%  |
|                                   | Overweight                                | 50   | 19.0%  |
|                                   | Obesity                                   | 28   | 10.6%  |
|                                   | Diabetes type 2                           | 16   | 6.1%   |
|                                   | Asthma                                    | 27   | 10.3%  |
|                                   | HIV/AIDS                                  | 6    | 2.3%   |
|                                   | Type 1 diabetes                           | 6    | 2.3%   |
|                                   | Hypothyroidism                            | 43   | 16.3%  |
|                                   | Cancer                                    | 9    | 3.4%   |
|                                   | Coagulation disorders                     | 6    | 2.3%   |
|                                   | Hyperthyroidism                           | 6    | 2.3%   |
|                                   | Total                                     | 263  | 100.0% |
| Smoke                             | No                                        | 853  | 77.5%  |
|                                   | Old smoker                                | 140  | 12.7%  |
|                                   | Yes, less 5 cigarettes a day              | 92   | 8.4%   |
|                                   | Yes, between 6 and 20 cigarettes per day  | 15   | 1.4%   |
|                                   | Total                                     | 1100 | 100.0% |
| Alcohol                           | No                                        | 298  | 27.1%  |
|                                   | Once every 3 months                       | 441  | 40.1%  |
|                                   | At least once a month                     | 267  | 24.3%  |
|                                   | At least once a week                      | 86   | 7.8%   |
|                                   | More than two times a week                | 8    | 0.7%   |
|                                   | Total                                     | 1100 | 100.0% |
| <b>COVID-19 infection history</b> |                                           |      |        |
| Number of infections              | Once                                      | 827  | 75.2%  |
|                                   | Twice                                     | 239  | 21.7%  |
|                                   | More than twice                           | 34   | 3.1%   |
|                                   | Total                                     | 1100 | 100.0% |
| Diagnostic confirmation           | PCR, antigen, or antibody tests           | 923  | 83.9%  |
|                                   | Physician confirmation                    | 36   | 3.3%   |
|                                   | Infected by someone who lived with me     | 141  | 12.8%  |
|                                   | Total                                     | 1100 | 100.0% |
| Clinical management               | None                                      | 86   | 7.8%   |
|                                   | Self-medication                           | 160  | 14.5%  |
|                                   | Medications prescribed by a physician     | 810  | 73.6%  |
|                                   | Hospitalization less than 3 days          | 7    | 0.6%   |
|                                   | Hospitalization between 3 and 7 days      | 12   | 1.1%   |
|                                   | Hospitalization more than 7 days          | 14   | 1.3%   |
|                                   | Intensive care unit (ICU) hospitalization | 11   | 1.0%   |
|                                   | Total                                     | 1100 | 100.0% |
| COVID-19 Vaccination history      | No                                        | 1    | 0.1%   |
|                                   | One dose                                  | 3    | 0.3%   |
|                                   | Two doses                                 | 173  | 15.7%  |
|                                   | Two doses and one booster                 | 781  | 71.0%  |

|                                       |                                    |      |        |
|---------------------------------------|------------------------------------|------|--------|
|                                       | Two doses and two boosters         | 142  | 12.9%  |
|                                       | Total                              | 1100 | 100.0% |
| Time of infection                     | Infection before vaccination       | 561  | 51.0%  |
|                                       | Infection after vaccination        | 539  | 49.0%  |
|                                       | Total                              | 1100 | 100.0% |
| <b>Long-term COVID-19 symptoms</b>    |                                    |      |        |
| Onset symptoms                        | Initiated with infection           | 449  | 40.8%  |
|                                       | 3 to 4 weeks after infection       | 414  | 37.6%  |
|                                       | 5 to 7 weeks after infection       | 103  | 9.4%   |
|                                       | 8 to 9 weeks after infection       | 50   | 4.5%   |
|                                       | Later than 10 weeks post-infection | 84   | 7.6%   |
|                                       | Total                              | 1100 | 100.0% |
| Symptoms duration                     | Between 1 to 4 weeks               | 224  | 20.4%  |
|                                       | Between 4 to 8 weeks               | 182  | 16.5%  |
|                                       | Between 8 to 12 weeks              | 115  | 10.5%  |
|                                       | Between 3 to 6 months              | 210  | 19.1%  |
|                                       | Between 6 to 12 months             | 131  | 11.9%  |
|                                       | For more than 13 months            | 238  | 21.6%  |
|                                       | Total                              | 1100 | 100.0% |
| Frequency of presentation             | Once a month                       | 97   | 8.8%   |
|                                       | Once every two weeks               | 84   | 7.6%   |
|                                       | Once a week                        | 216  | 19.6%  |
|                                       | Over 3 days a week                 | 297  | 27.0%  |
|                                       | Daily                              | 331  | 30.1%  |
|                                       | Other                              | 75   | 6.8%   |
|                                       | Total                              | 1100 | 100.0% |
| Symptoms evolution                    | Has improved                       | 389  | 35.4%  |
|                                       | Has been consistent                | 345  | 31.4%  |
|                                       | Intermittent (appear - disappear)  | 316  | 28.7%  |
|                                       | Has gotten worse                   | 50   | 4.5%   |
|                                       | Total                              | 1100 | 100.0% |
| Visited a physician                   | Yes                                | 492  | 44.7%  |
|                                       | No                                 | 608  | 55.3%  |
|                                       | Total                              | 1100 | 100.0% |
| Medications prescribed by a physician | Yes                                | 335  | 30.5%  |
|                                       | No                                 | 765  | 69.5%  |
|                                       | Total                              | 1100 | 100.0% |
| Self-medication                       | Yes                                | 367  | 33.4%  |
|                                       | No                                 | 733  | 66.6%  |
|                                       | Total                              | 1100 | 100.0% |

---

\*: Median and interquartile range (IQR), BMI: body mass index, PCR: polymerase chain reaction.

**Supplementary file S2.** Self-reported long-COVID symptoms distributed by characteristics of Ecuadorian participants.

| Symptoms                                  | Sex n (%) |            |            |                 | Comorbidities n (%) |            |                 |         | Ethnicity n (%) |             |            |            |        | BMI n (%)    |              |            |             |           | p Value         |
|-------------------------------------------|-----------|------------|------------|-----------------|---------------------|------------|-----------------|---------|-----------------|-------------|------------|------------|--------|--------------|--------------|------------|-------------|-----------|-----------------|
|                                           | Total n   | Male       | Female     | p Value         | No                  | Yes        | p Value         | Afro    | White           | Indigeno us | Mestizo    | Montubi os | Othe r | p Value      | Underweig ht | Normal     | Overweig ht | Obesit y  |                 |
| Alopecia                                  | 32        | 12 (37.5)  | 20 (62.5)  | 0.999           | 22 (68.8)           | 10 (31.2)  | 0.237           | --      | 1 (3.1)         | --          | 31 (96.9)  | --         | --     | 0.832        | 1 (3.1)      | 16 (50)    | 10 (31.2)   | 5 (15.6)  | 0.989           |
| Taste dysfunction                         | 199       | 56 (28.1)  | 143 (71.9) | <b>0.013</b>    | 162 (81.4)          | 37 (18.6)  | 0.354           | 2 (1.0) | 10 (5.0)        | 4 (2.0)     | 178 (89.5) | 4 (2.0)    | (0.5)  | 0.186        | 7 (3.5)      | (59.3)     | 52 (26.1)   | 22 (11.1) | <b>0.01</b>     |
| Alterations in glucose                    | 16        | 7 (43.7)   | 9 (56.3)   | 0.697           | 8 (50.0)            | 8 (50.0)   | <b>0.011</b>    | 1 (6.3) | --              | 1 (6.3)     | 13 (81.2)  | 1 (6.2)    | --     | <b>1</b>     |              | 4 (25)     | 10 (62.5)   | 2 (12.5)  | 0.052           |
| Menstrual cycle alterations               | 118       | 0 (0.0)    | (100.0)    | <b>NA</b>       | 16 (74.6)           | 30 (25.4)  | 0.295           | (0.9)   | 6 (5.1)         | 1 (0.8)     | 106 (89.8) | 4 (3.4)    | --     | 0.369        | 3 (2.5)      | (53.4)     | 37 (31.4)   | 15 (12.7) | 0.835           |
| Hallucinations                            | 20        | 9 (45.0)   | 11 (55.0)  | 0.541           | (80.0)              | 4 (20.0)   | 0.999           | --      | --              | 1 (5.0)     | 18 (90.0)  | --         | (5.0)  | <b>1</b>     |              | 9 (45)     | 9 (45)      | 2 (10)    | 0.576           |
| Anxiety                                   | 379       | 111 (29.3) | 268 (70.7) | <b>&lt;0.00</b> | 293 (77.3)          | 86 (22.7)  | 0.449           | 1 (0.3) | 15 (4.0)        | 2 (0.5)     | 356 (93.9) | 3 (0.8)    | (0.5)  | 0.365        | 13 (3.4)     | (49.9)     | 119 (31.4)  | 58 (15.3) | 0.466           |
| Brittle hair                              | 111       | 9 (8.1)    | (91.9)     | <b>1</b>        | 81 (73.0)           | 30 (27.0)  | 0.149           | --      | 3 (2.7)         | --          | 105 (94.6) | 3 (2.7)    | --     | 0.193        | 4 (3.6)      | (53.2)     | 34 (30.6)   | 14 (12.6) | 0.716           |
| Mood changes                              | 234       | 80 (34.2)  | 154 (65.8) | 0.566           | 184 (78.6)          | 50 (21.4)  | 0.999           | 1 (0.4) | 19 (8.1)        | 2 (0.9)     | 205 (87.6) | 5 (2.1)    | (0.9)  | 0.148        | 7 (3)        | 117 (50)   | 83 (35.5)   | 27 (11.5) | 0.543           |
| Tachycardia                               | 184       | 32 (38.6)  | (61.4)     | 0.473           | 142 (77.2)          | 42 (22.8)  | 0.641           | (0.5)   | (9.3)           | 1 (0.5)     | 161 (87.5) | 2 (1.1)    | (1.1)  | 0.075        | 4 (2.2)      | (44.6)     | 74 (40.2)   | 24 (13)   | 0.217           |
| Blood pressure changes                    | 74        | 22 (43.2)  | 42 (56.8)  | 0.223           | 44 (59.5)           | 30 (40.5)  | <b>&lt;0.00</b> | 1 (1.3) | (9.3)           | 1 (1.3)     | 62 (87.5)  | 3 (4.1)    | (1.1)  | 0.075        | 4 (2.2)      | 31 (44.6)  | 26 (74)     | 26 (13)   | <b>&lt;0.00</b> |
| Confusion                                 | 61        | 22 (36.1)  | 39 (63.9)  | 0.999           | 45 (73.8)           | 16 (26.2)  | <b>1</b>        | (1.3)   | 6 (8.1)         | 1 (1.3)     | 53 (83.8)  | 3 (4.1)    | (1.4)  | 0.095        |              | (41.9)     | 17 (23)     | (35.1)    | <b>1</b>        |
| Diarrhea                                  | 56        | 11 (19.6)  | 39 (63.9)  | 0.999           | 45 (73.8)           | 16 (26.2)  | 0.416           | --      | 4 (6.6)         | 1 (1.6)     | 53 (86.9)  | 2 (3.3)    | (1.6)  | 0.225        | 1 (1.6)      | 27 (44.3)  | 21 (34.4)   | 12 (19.7) | 0.598           |
| Difficulty concentrating                  | 387       | 113 (29.2) | 274 (70.8) | 0.013           | 298 (77.0)          | 89 (23.0)  | 0.418           | 1 (1.8) | 2 (3.6)         | 1 (1.8)     | 50 (89.2)  | 2 (3.6)    | --     | 0.281        | 2 (3.6)      | 30 (53.6)  | 15 (26.8)   | 9 (16.1)  | 0.724           |
| Speech disturbance                        | 241       | 77 (31.9)  | 164 (68.1) | <b>&lt;0.00</b> | 191 (77.0)          | 50 (23.0)  | 0.34            | 3 (0.8) | 13 (3.4)        | 1 (0.2)     | 362 (93.5) | 5 (1.3)    | (0.8)  | 0.078        | 8 (2.1)      | 191 (49.4) | 63 (125)    | 63 (16.3) | 0.468           |
| Decreased visual acuity                   | 147       | 42 (28.6)  | 105 (71.4) | 0.159           | 114 (79.3)          | 33 (20.7)  | 0.891           | 1 (0.4) | 9 (3.7)         | 1 (0.4)     | 133 (94.3) | 1 (0.4)    | (0.8)  | 0.292        | 7 (2.9)      | (47.3)     | 79 (32.8)   | 41 (17)   | 0.586           |
| Loss of muscle strength                   | 170       | 68 (40.0)  | 102 (60.0) | 0.054           | 129 (77.6)          | 41 (22.4)  | 0.791           | 1 (0.7) | 7 (4.7)         | 1 (0.7)     | 145 (90.5) | 3 (2.0)    | (1.4)  | 0.368        | 5 (3.4)      | (46.9)     | 43 (29.3)   | 30 (20.4) | 0.119           |
| Decreased libido/sexual desire            | 115       | 44 (38.3)  | 71 (61.7)  | 0.274           | 129 (75.9)          | 41 (24.1)  | 0.376           | (0.6)   | (10.6)          | 2 (1.2)     | 145 (85.3) | 3 (1.7)    | (0.6)  | <b>0.032</b> | 5 (2.9)      | (36.5)     | 79 (46.5)   | 24 (14.1) | <b>0.001</b>    |
| Abdominal pain                            | 70        | 18 (25.7)  | 52 (74.3)  | 0.666           | 89 (77.4)           | 26 (22.6)  | 0.802           | (0.9)   | (10.4)          | 3 (2.6)     | 95 (82.6)  | 4 (3.5)    | --     | <b>0.001</b> | 2 (1.7)      | (40.9)     | 50 (43.5)   | 16 (13.9) | 0.106           |
| Headache                                  | 354       | 97 (27.4)  | 257 (72.6) | 0.084           | 279 (77.1)          | 75 (22.9)  | 0.854           | --      | 3 (4.3)         | 1 (1.4)     | 63 (90.0)  | 2 (2.9)    | (1.4)  |              | 0.377        | 35 (50)    | 27 (38.6)   | 8 (11.4)  | 0.625           |
| Chest pain                                | 187       | 71 (38.0)  | 116 (62.0) | <b>&lt;0.00</b> | 279 (78.8)          | 75 (21.2)  | 0.999           | 4 (1.1) | 20 (5.7)        | 3 (0.8)     | 318 (89.9) | 5 (1.4)    | (1.1)  | <b>0.033</b> | 8 (2.3)      | (51.4)     | 117 (33.1)  | 47 (13.3) | 0.764           |
| Burning sensation in any part of the body | 75        | 25 (33.3)  | 50 (66.7)  | 0.595           | 157 (84.0)          | 30 (16.0)  | 0.068           | (0.5)   | (10.2)          | 2 (1.1)     | 162 (86.6) | 1 (0.5)    | (1.1)  | 0.011        | 3 (1.6)      | (50.8)     | 68 (36.4)   | 21 (11.2) | 0.381           |
| Unusual muscle aches                      | 109       | 44 (40.4)  | 65 (59.6)  | 0.708           | 80 (73.3)           | 29 (26.7)  | 0.301           | (2.7)   | 5 (6.7)         | 1 (1.3)     | 95 (88.0)  | --         | (1.3)  | 0.052        |              | (37.3)     | 29 (38.7)   | 17 (24)   | <b>0.018</b>    |
| Usual muscle aches                        | 164       | 54 (32.9)  | 110 (67.1) | 0.37            | 123 (73.4)          | 41 (26.6)  | 0.191           | (0.9)   | 9 (8.3)         | 2 (1.8)     | 151 (87.2) | 2 (1.8)    | --     | 0.321        | 1 (0.9)      | (40.4)     | 47 (43.1)   | 31 (15.6) | 0.078           |
| Shaking chills                            | 45        | 11 (24.4)  | 34 (75.6)  | 0.423           | 37 (75.0)           | 8 (25.0)   | 0.246           | --      | 7 (4.3)         | 2 (1.2)     | 40 (92.1)  | 3 (1.8)    | (0.6)  | 0.792        | 3 (1.8)      | (40.2)     | 64 (39)     | 5 (18.9)  | <b>0.041</b>    |
| Sneezing                                  | 92        | 31 (33.7)  | 61 (66.3)  | 0.136           | 80 (82.2)           | 12 (17.8)  | 0.689           | (2.2)   | 1 (2.2)         | --          | 83 (89.0)  | 2 (4.4)    | (2.2)  | <b>0.026</b> |              | (57.8)     | 14 (31.1)   | 5 (11.1)  | 0.598           |
| Fatigue or tiredness                      | 652       | 221 (33.9) | 431 (66.1) | 0.713           | 500 (87.0)          | 152 (13.0) | 0.059           | (1.1)   | 4 (4.3)         | 2 (2.2)     | 585 (90.2) | 2 (2.2)    | --     | 0.391        | 2 (2.2)      | (54.3)     | 27 (29.3)   | 94 (14.1) | 0.777           |
| Tingling in extremities                   | 137       | 50 (36.5)  | 87 (63.5)  | 0.091           | 106 (77.0)          | 31 (23.0)  | 0.054           | (0.6)   | (6.4)           | 7 (1.1)     | 113 (89.7) | 11 (1.7)   | (0.5)  | 0.129        | 12 (1.8)     | (49.8)     | 221 (33.9)  | 25 (14.4) | 0.266           |
| Insomnia                                  | 342       | 107 (31.3) | 235 (68.7) | 0.972           | 259 (77.4)          | 83 (22.6)  | 0.762           | --      | (11.7)          | 4 (2.9)     | 312 (82.5) | 2 (1.4)    | (1.5)  | <b>1</b>     | 2 (1.5)      | (34.3)     | 63 (46.0)   | 53 (18.2) | <b>0.001</b>    |
| Heat intolerance                          | 20        | 7 (35.0)   | 13 (65.0)  | 0.972           | 259 (75.7)          | 83 (24.3)  | 0.12            | 3 (0.9) | (5.6)           | --          | 312 (91.2) | 6 (1.7)    | (0.6)  | 0.693        | 8 (2.3)      | (49.7)     | 111 (32.5)  | 53 (15.5) | 0.851           |
| Cold intolerance                          | 92        | 28 (30.4)  | 64 (69.6)  | 0.294           | 74 (80.4)           | 18 (19.6)  | 0.073           | --      | 1 (5.0)         | --          | 89 (95.0)  | --         | --     | 0.999        |              | 7 (35)     | 9 (45)      | 4 (20)    | 0.361           |
| Nausea                                    | 68        | 10 (14.7)  | 58 (85.3)  | 0.776           | 52 (76.5)           | 16 (23.5)  | 0.776           | --      | 3 (3.2)         | --          | 62 (96.8)  | --         | --     | 0.448        | 2 (2.2)      | (44.6)     | 34 (37)     | 41 (16.3) | 0.758           |
| Neuritis                                  | 96        | 22 (22.9)  | 74 (77.1)  | <b>&lt;0.00</b> | 65 (76.5)           | 31 (23.5)  | 0.752           | 1 (1.5) | 2 (2.9)         | 1 (1.5)     | 87 (91.2)  | 2 (2.9)    | --     | 0.434        | 1 (1.5)      | (60.3)     | 20 (29.4)   | 6 (8.8)   | 0.259           |
|                                           |           |            |            | <b>0.007</b>    | 65 (67.7)           | 31 (32.3)  | <b>0.008</b>    | 2 (2.1) | 5 (5.2)         | 1 (1.0)     | 87 (90.7)  | 1 (1.0)    | --     | 0.31         | 2 (2.1)      | (38.5)     | 38 (39.6)   | 19 (19.8) | 0.113           |

|                           |             |                |               |                  |               |              |              |            |              |           |               |            |            |                  |            |               |             |               |              |
|---------------------------|-------------|----------------|---------------|------------------|---------------|--------------|--------------|------------|--------------|-----------|---------------|------------|------------|------------------|------------|---------------|-------------|---------------|--------------|
| Palpitations              | 182         | 59<br>(32.4)   | 123<br>(67.6) | 0.308            | 139<br>(76.4) | 43<br>(23.6) | 0.453        | 1<br>(0.6) | 8 (4.4)      | 3 (1.7)   | 163<br>(89.4) | 4 (2.2)    | 3<br>(1.7) | <b>0.015</b>     | 2 (1.1)    | 83<br>(45.6)  | 69 (37.9)   | 28<br>(15.4)  | 0.261        |
| Facial paralysis          | 7           | 4 (57.1)       | 3 (42.9)      | 0.438            | 6 (85.7)      | 1 (14.3)     | 0.999        | --         | --           | 1 (14.3)  | 6 (85.7)      | --         | --         | 0.056            |            | 3 (42.9)      |             | 4<br>(57.1)   | 0.08         |
| Loss of appetite          | 55          | 16<br>(23.6)   | 42 (76.4)     | 0.069            | 35<br>(83.6)  | 14<br>(16.4) | 0.457        | --         | 2 (3.6)      | 1 (1.8)   | 49<br>(89.1)  | 3 (5.5)    | --         | <b>0.039</b>     |            | 32<br>(58.2)  | 20 (36.4)   | 3 (5.5)       | 0.129        |
| Hearing loss              | 49          | 16<br>(32.6)   | 33 (67.4)     | 0.728            | 35<br>(71.4)  | 14<br>(28.6) | 0.272        | --         | 2 (4.1)      | 1 (2.0)   | 45<br>(91.9)  | 1 (2.0)    | --         | 0.675            | 1 (2)      | 18<br>(36.7)  | 20 (40.8)   | 10<br>(20.4)  | 0.277        |
| Hair loss                 | 391         | 75<br>(19.2)   | 316<br>(80.8) | <b>&lt;0.001</b> | 303<br>(77.5) | 88<br>(22.5) | 0.506        | 2<br>(0.5) | 23<br>(5.9)  | 2 (0.5)   | 353<br>(90.2) | 10 (2.6)   | 1<br>(0.3) | 0.195            | 16 (4.1)   | 198<br>(50.6) | 123 (31.5)  | 54<br>(13.8)  | 0.113        |
| Loss of taste             | 172         | 59<br>(34.3)   | 113<br>(65.7) | 0.675            | 135<br>(78.5) | 37<br>(21.5) | 0.999        | 1<br>(0.6) | 9 (5.2)      | --        | 155<br>(90.1) | 6 (3.5)    | 1<br>(0.6) | 0.134            | 9 (5.2)    | 89<br>(51.7)  | 54 (31.4)   | 20<br>(11.6)  | 0.079        |
| Memory deficits           | 287         | 84<br>(29.3)   | 203<br>(70.7) | <b>0.007</b>     | 229<br>(79.8) | 58<br>(20.2) | 0.668        | 2<br>(0.7) | 13<br>(4.5)  | 1 (0.4)   | 267<br>(93.0) | 2 (0.7)    | 2<br>(0.7) | 0.554            | 10 (3.5)   | 130<br>(45.3) | 101 (35.2)  | 46 (16)       | 0.323        |
| Muscle loss               | 97          | 48<br>(49.5)   | 49 (50.5)     | <b>0.005</b>     | 77<br>(79.4)  | 20<br>(20.6) | 0.972        | 2<br>(2.1) | 7 (7.3)      | 1 (1.0)   | 86<br>(88.6)  | 1 (1.0)    | --         | 0.242            | 2 (2.1)    | 44<br>(45.4)  | 34 (35.1)   | 17<br>(17.5)  | 0.728        |
| Loss of smell             | 263         | 90<br>(34.2)   | 173<br>(65.8) | 0.538            | 203<br>(77.2) | 60<br>(22.8) | 0.539        | 1<br>(0.4) | 11<br>(4.2)  | 2 (0.8)   | 243<br>(92.3) | 5 (1.9)    | 1<br>(0.4) | 0.871            | 9 (3.4)    | 144<br>(54.8) | 80 (30.4)   | 30<br>(11.4)  | 0.117        |
| Body hair loss            | 14          | 7 (50.0)       | 7 (50.0)      | 0.413            | 8 (57.1)      | 6 (42.9)     | 0.097        | --         | --           | --        | 14<br>(100.0) | --         | --         | <b>&lt;0.001</b> |            | 10<br>(71.4)  | 2 (14.3)    | 2<br>(14.3)   | 0.238        |
| Pruritus (itching)        | 114         | 40<br>(35.1)   | 74 (64.9)     | 0.911            | 88<br>(77.2)  | 26<br>(22.8) | 0.763        | 2<br>(1.8) | 10<br>(8.8)  | 3 (2.6)   | 96<br>(84.1)  | 2 (1.8)    | 1<br>(0.9) | <b>0.013</b>     | 2 (1.8)    | 61<br>(53.5)  | 33 (28.9)   | 18<br>(15.8)  | 0.619        |
| Gastroesophageal reflux   | 87          | 35<br>(40.2)   | 52 (59.8)     | 0.459            | 65<br>(74.7)  | 22<br>(25.3) | 0.413        | 1<br>(1.2) | 12<br>(13.8) | 1 (1.2)   | 73<br>(83.8)  | --         | --         | <b>0.003</b>     |            | 30<br>(34.5)  | 41 (47.1)   | 16<br>(18.4)  | <b>0.006</b> |
| Skin dryness              | 139         | 22<br>(15.8)   | 117<br>(84.2) | <b>1</b>         | 100<br>(71.9) | 39<br>(28.1) | <b>0.047</b> | 1<br>(0.7) | 1<br>(6.4.3) | --        | 128<br>(92.1) | 4 (2.9)    | --         | 0.384            | 1 (0.7)    | 73<br>(52.5)  | 45 (32.4)   | 20<br>(14.4)  | 0.46         |
| Thirst                    | 77          | 32<br>(41.6)   | 45 (58.4)     | 0.352            | 65<br>(84.4)  | 12<br>(15.6) | 0.263        | 1<br>(1.3) | 12<br>(15.6) | 1 (1.3)   | 60<br>(77.9)  | 2 (2.6)    | 1<br>(1.3) | <b>&lt;0.001</b> | 1 (1.3)    | 37<br>(48.1)  | 30 (39)     | 9<br>(11.7)   | 0.629        |
| Easy crying               | 202         | 43<br>(21.3)   | 159<br>(78.7) | <b>&lt;0.001</b> | 159<br>(78.7) | 43<br>(21.3) | 0.999        | 2<br>(1.0) | 2<br>(7.3.5) | 2 (1.0)   | 186<br>(92.0) | 4 (2.0)    | 1<br>(0.5) | 0.607            | 4 (2)      | 1<br>(95.47)  | 76 (37.6)   | 27<br>(13.4)  | 0.552        |
| Excessive sweating        | 90          | 30<br>(33.3)   | 60 (66.7)     | 0.663            | 59<br>(65.6)  | 31<br>(34.4) | <b>0.002</b> | --         | --           | --        | 87<br>(96.7)  | 2 (2.2)    | 1<br>(1.1) | 0.42             |            | 1<br>(36.40)  | 35 (38.9)   | 19<br>(21.1)  | 0.063        |
| Tremor of the extremities | 90          | 23<br>(25.6)   | 67 (74.4)     | <b>0.041</b>     | 63<br>(70.0)  | 27<br>(30.0) | <b>0.048</b> | 2<br>(2.2) | 2 (2.2)      | 3 (3.3)   | 81<br>(90.1)  | 1 (1.1)    | 1<br>(1.1) | <b>0.003</b>     | 1 (1.1)    | 46<br>(51.1)  | 36 (40)     | 7 (7.8)       | 0.164        |
| Persistent cough          | 245         | 85<br>(34.7)   | 160<br>(65.3) | 0.683            | 196<br>(80.0) | 49<br>(20.0) | 0.643        | 2<br>(0.8) | 22<br>(9.0)  | 2 (0.8)   | 218<br>(89.0) | 1 (0.4)    | --         | <b>0.033</b>     | 5 (2)      | 127<br>(51.8) | 86 (35.1)   | 14<br>(27.11) | 0.325        |
| Brittle nails             | 113         | 105<br>(8.7.1) | 105<br>(92.9) | <b>&lt;0.001</b> | 94<br>(83.2)  | 19<br>(16.8) | 0.271        | --         | 4 (3.5)      | --        | 106<br>(93.8) | 3 (2.7)    | --         | 0.313            | 2 (1.8)    | 64<br>(56.6)  | 33 (29.2)   | 14<br>(12.4)  | 0.436        |
| Vomit                     | 25          | 6 (24.0)       | 19 (76.0)     | 0.292            | 18<br>(72.0)  | 7 (28.0)     | 0.559        | --         | --           | 1 (4.0)   | 23 (92)       | 1 (4.0)    | --         | 0.097            |            | 18 (72)       | 5 (20)      | 2 (8)         | 0.099        |
| <b>Total</b>              | <b>7746</b> | <b>2341</b>    | <b>5405</b>   |                  | <b>5974</b>   | <b>1772</b>  |              | <b>56</b>  | <b>448</b>   | <b>74</b> | <b>6984</b>   | <b>136</b> | <b>48</b>  |                  | <b>178</b> | <b>3760</b>   | <b>2669</b> | <b>1139</b>   |              |

**Supplementary file S3.** Distribution of self-reported long-COVID symptoms by age group among 1100 patients.

| Symptom                                   | Total n | 0 to 10  | 10 to 20  | 20 to 30   | 30 to 40   | 40 to 50   | 50 to 60  | 60 to 70 | 70 to 80 | 80 to 90 | p Value          |
|-------------------------------------------|---------|----------|-----------|------------|------------|------------|-----------|----------|----------|----------|------------------|
|                                           |         | n (%)    | n (%)     | n (%)      | n (%)      | n (%)      | n (%)     | n (%)    | n (%)    | n (%)    |                  |
| Alopecia                                  | 32      | --       | --        | 13 (40.6)  | 11 (34.4)  | 5 (15.6)   | 3 (9.4)   | --       | --       | --       | 0.908            |
| Taste dysfunction                         | 199     | --       | 22 (11.1) | 84 (42.2)  | 52 (26.1)  | 30 (15.1)  | 8 (4.0)   | 1 (0.5)  | 2 (1.0)  | --       | <b>&lt;0.001</b> |
| Alterations in glucose                    | 16      | --       | 1 (6.3)   | 3 (18.8)   | 4 (25.0)   | 5 (31.3)   | 2 (12.5)  | --       | 1 (6.3)  | --       | <b>0.017</b>     |
| Menstrual cycle alterations               | 118     | --       | 6 (5.1)   | 40 (33.9)  | 47 (39.8)  | 23 (19.5)  | 2 (1.7)   | --       | --       | --       | 0.172            |
| Hallucinations                            | 20      | --       | --        | 6 (30.0)   | 11 (55.0)  | 1 (5.0)    | 1 (5.0)   | 1 (5.0)  | --       | --       | 0.185            |
| Anxiety                                   | 379     | --       | 27 (7.1)  | 141 (37.2) | 119 (31.4) | 65 (17.2)  | 22 (5.8)  | 3 (0.8)  | 2 (0.5)  | --       | 0.334            |
| Brittle hair                              | 111     | --       | 8 (7.2)   | 44 (39.6)  | 40 (36.0)  | 10 (9.0)   | 8 (7.2)   | 1 (0.9)  | --       | --       | 0.227            |
| Mood changes                              | 234     | 1 (0.43) | 15 (6.4)  | 92 (39.3)  | 76 (32.5)  | 39 (16.7)  | 9 (3.9)   | 2 (0.9)  | --       | --       | 0.122            |
| Tachycardia                               | 184     | --       | 16 (8.7)  | 54 (29.4)  | 70 (38.0)  | 28 (15.2)  | 11 (6.0)  | 4 (2.2)  | 1 (0.5)  | --       | 0.173            |
| Blood pressure changes                    | 74      | --       | 5 (6.8)   | 20 (27.0)  | 17 (23.0)  | 21 (28.4)  | 7 (9.5)   | 4 (5.4)  | --       | --       | <b>0.001</b>     |
| Confusion                                 | 61      | --       | 3 (4.9)   | 15 (24.6)  | 28 (45.9)  | 10 (16.4)  | 2 (3.3)   | 3 (4.9)  | --       | --       | <b>0.039</b>     |
| Diarrhea                                  | 56      | --       | 4 (7.1)   | 12 (21.4)  | 26 (46.4)  | 11 (19.6)  | 3 (5.4)   | --       | --       | --       | 0.182            |
| Difficulty concentrating                  | 387     | --       | 28 (7.2)  | 152 (39.3) | 131 (33.9) | 53 (13.7)  | 21 (5.4)  | 2 (0.5)  | --       | --       | <b>0.007</b>     |
| Speech disturbance                        | 241     | --       | 8 (3.3)   | 78 (32.4)  | 98 (40.7)  | 38 (15.8)  | 16 (6.6)  | 3 (1.2)  | --       | --       | 0.169            |
| Decreased visual acuity                   | 147     | --       | 6 (4.1)   | 36 (24.5)  | 47 (32.0)  | 39 (26.5)  | 14 (9.5)  | 5 (3.4)  | --       | --       | <b>&lt;0.001</b> |
| Loss of muscle strength                   | 170     | --       | 7 (4.1)   | 51 (30.0)  | 65 (38.2)  | 23 (13.5)  | 16 (9.4)  | 5 (2.9)  | 3 (1.8)  | --       | <b>0.011</b>     |
| Decreased libido/sexual desire            | 115     | --       | 1 (0.9)   | 33 (28.7)  | 45 (39.1)  | 27 (23.5)  | 8 (7.0)   | 1 (0.9)  | --       | --       | 0.067            |
| Abdominal pain                            | 70      | --       | 6 (8.6)   | 27 (38.6)  | 21 (30.0)  | 7 (10.0)   | 6 (8.6)   | 2 (2.9)  | 1 (1.4)  | --       | 0.316            |
| Headache                                  | 354     | --       | 23 (6.5)  | 134 (37.9) | 119 (33.6) | 55 (15.5)  | 19 (5.4)  | 4 (1.1)  | --       | --       | 0.442            |
| Chest pain                                | 187     | --       | 15 (8.0)  | 59 (31.6)  | 73 (39.0)  | 22 (11.8)  | 15 (8.0)  | 2 (1.1)  | --       | 1 (0.5)  | <b>0.021</b>     |
| Burning sensation in any part of the body | 75      | --       | 4 (5.3)   | 21 (28.0)  | 23 (30.7)  | 15 (20.0)  | 9 (12.0)  | 3 (4.0)  | --       | --       | 0.098            |
| Unusual muscle aches                      | 109     | --       | 6 (5.5)   | 26 (23.9)  | 36 (33.0)  | 24 (22.0)  | 13 (11.9) | 3 (2.8)  | 1 (0.9)  | --       | <b>0.043</b>     |
| Usual muscle aches                        | 164     | --       | 12 (7.3)  | 40 (24.4)  | 65 (39.6)  | 26 (15.9)  | 16 (9.8)  | 4 (2.4)  | 1 (0.6)  | --       | <b>0.029</b>     |
| Shaking chills                            | 45      | --       | 10 (22.2) | 14 (31.1)  | 13 (28.9)  | 4 (8.9)    | 4 (8.9)   | --       | --       | --       | <b>&lt;0.001</b> |
| Sneezing                                  | 92      | --       | 10 (10.9) | 33 (35.9)  | 30 (32.6)  | 11 (12.0)  | 6 (6.5)   | 1 (1.09) | --       | 1 (1.1)  | <b>0.006</b>     |
| Fatigue or tiredness                      | 652     | 1 (0.15) | 35 (5.4)  | 237 (36.4) | 209 (32.1) | 112 (17.2) | 40 (6.1)  | 11 (1.7) | 6 (0.9)  | 1 (0.2)  | 0.274            |
| Tingling in extremities                   | 137     | --       | 8 (5.8)   | 29 (21.2)  | 58 (42.3)  | 21 (15.3)  | 16 (11.7) | 3 (2.2)  | 2 (1.5)  | --       | <b>0.001</b>     |
| Insomnia                                  | 342     | --       | 24 (7.0)  | 113 (33.0) | 112 (32.8) | 59 (17.3)  | 28 (8.2)  | 4 (1.2)  | 1 (0.3)  | 1 (0.3)  | 0.353            |
| Heat intolerance                          | 20      | --       | --        | 9 (45.0)   | 6 (30.0)   | --         | 4 (20.0)  | 1 (5.0)  | --       | --       | 0.154            |
| Cold intolerance                          | 92      | --       | 6 (6.5)   | 30 (32.6)  | 28 (30.4)  | 18 (19.6)  | 8 (8.7)   | 2 (2.17) | --       | --       | 0.831            |
| Nausea                                    | 68      | --       | 9 (13.2)  | 31 (45.6)  | 19 (27.9)  | 4 (5.9)    | 3 (4.4)   | --       | 2 (2.9)  | --       | <b>&lt;0.001</b> |
| Neuritis                                  | 96      | --       | 1 (1.0)   | 18 (18.8)  | 33 (34.4)  | 26 (27.1)  | 15 (15.6) | 2 (2.1)  | 1 (1.0)  | --       | <b>&lt;0.001</b> |
| Palpitations                              | 182     | --       | 8 (4.4)   | 55 (30.2)  | 70 (38.5)  | 31 (17.0)  | 14 (7.7)  | 3 (1.7)  | 1 (0.6)  | --       | 0.719            |
| Facial paralysis                          | 7       | --       | --        | 2 (28.6)   | 2 (28.6)   | 2 (28.6)   | --        | 1 (14.3) | --       | --       | 0.046            |
| Loss of appetite                          | 55      | --       | 11 (20.0) | 18 (32.7)  | 17 (30.9)  | 5 (9.1)    | 2 (3.6)   | --       | 1 (1.8)  | 1 (1.8)  | <b>&lt;0.001</b> |
| Hearing loss                              | 49      | --       | 2 (4.1)   | 13 (26.5)  | 15 (30.6)  | 10 (20.4)  | 8 (16.3)  | 1 (2.0)  | --       | --       | 0.101            |
| Hair loss                                 | 391     | --       | 25 (6.4)  | 140 (35.8) | 129 (33.0) | 68 (17.4)  | 24 (6.1)  | 5 (1.3)  | --       | --       | 0.918            |
| Loss of taste                             | 172     | --       | 22 (12.8) | 60 (34.9)  | 46 (26.7)  | 27 (15.7)  | 12 (7.0)  | 3 (1.7)  | 2 (1.2)  | --       | <b>&lt;0.001</b> |
| Memory deficits                           | 287     | --       | 10 (3.5)  | 90 (31.4)  | 121 (42.2) | 43 (15.0)  | 21 (7.3)  | 2 (0.7)  | --       | --       | <b>0.011</b>     |
| Muscle loss                               | 97      | --       | 6 (6.2)   | 33 (34.0)  | 33 (34.0)  | 15 (15.5)  | 6 (6.2)   | 3 (3.1)  | 1 (1.0)  | --       | 0.789            |
| Loss of smell                             | 263     | --       | 28 (10.7) | 98 (37.3)  | 75 (28.5)  | 40 (15.2)  | 17 (6.5)  | 5 (1.9)  | --       | --       | <b>&lt;0.001</b> |
| Body hair loss                            | 14      | --       | --        | 5 (35.7)   | 6 (42.9)   | 2 (14.3)   | 1 (7.1)   | --       | --       | --       | 0.957            |
| Pruritus (itching)                        | 114     | --       | 6 (5.3)   | 26 (22.8)  | 42 (36.8)  | 28 (24.6)  | 8 (7.0)   | 4 (3.5)  | --       | --       | <b>0.018</b>     |
| Gastroesophageal reflux                   | 87      | --       | 2 (2.3)   | 24 (27.6)  | 36 (41.4)  | 16 (18.4)  | 7 (8.1)   | 2 (2.3)  | --       | --       | 0.341            |

|                           |             |          |            |             |             |             |            |            |           |          |                  |
|---------------------------|-------------|----------|------------|-------------|-------------|-------------|------------|------------|-----------|----------|------------------|
| Skin dryness              | 139         | --       | 10 (7.2)   | 38 (27.3)   | 55 (39.6)   | 20 (14.4)   | 13 (9.4)   | 2 (1.4)    | 1 (0.7)   | --       | 0.257            |
| Thirst                    | 77          | --       | 12 (15.6)  | 24 (31.2)   | 34 (44.2)   | 6 (7.8)     | 1 (1.3)    | --         | --        | --       | <b>&lt;0.001</b> |
| Easy crying               | 202         | 1 (0.5)  | 19 (9.4)   | 73 (36.1)   | 70 (34.7)   | 27 (13.4)   | 11 (5.5)   | 1 (0.5)    | --        | --       | <b>0.015</b>     |
| Excessive sweating        | 90          | --       | 7 (7.8)    | 16 (17.8)   | 32 (35.6)   | 26 (28.9)   | 7 (7.8)    | 2 (2.2)    | --        | --       | <b>0.004</b>     |
| Tremor of the extremities | 90          | --       | 9 (10.0)   | 30 (33.3)   | 31 (34.4)   | 10 (11.1)   | 9 (10.0)   | 1 (1.1)    | --        | --       | 0.169            |
| Persistent cough          | 245         | 1 (0.41) | 13 (5.3)   | 94 (38.4)   | 89 (36.3)   | 34 (13.9)   | 11 (4.5)   | --         | 2 (0.8)   | 1 (0.4)  | 0.066            |
| Brittle nails             | 113         | --       | 13 (11.5)  | 35 (31.0)   | 32 (28.3)   | 20 (17.7)   | 10 (8.9)   | 2 (1.8)    | 1 (0.9)   | --       | 0.074            |
| Vomit                     | 25          | --       | 5 (20.0)   | 12 (48.0)   | 8 (32.0)    | --          | --         | --         | --        | --       | <b>0.036</b>     |
| <b>Total</b>              | <b>7746</b> | <b>4</b> | <b>534</b> | <b>2581</b> | <b>2675</b> | <b>1262</b> | <b>537</b> | <b>114</b> | <b>33</b> | <b>6</b> |                  |

(A)

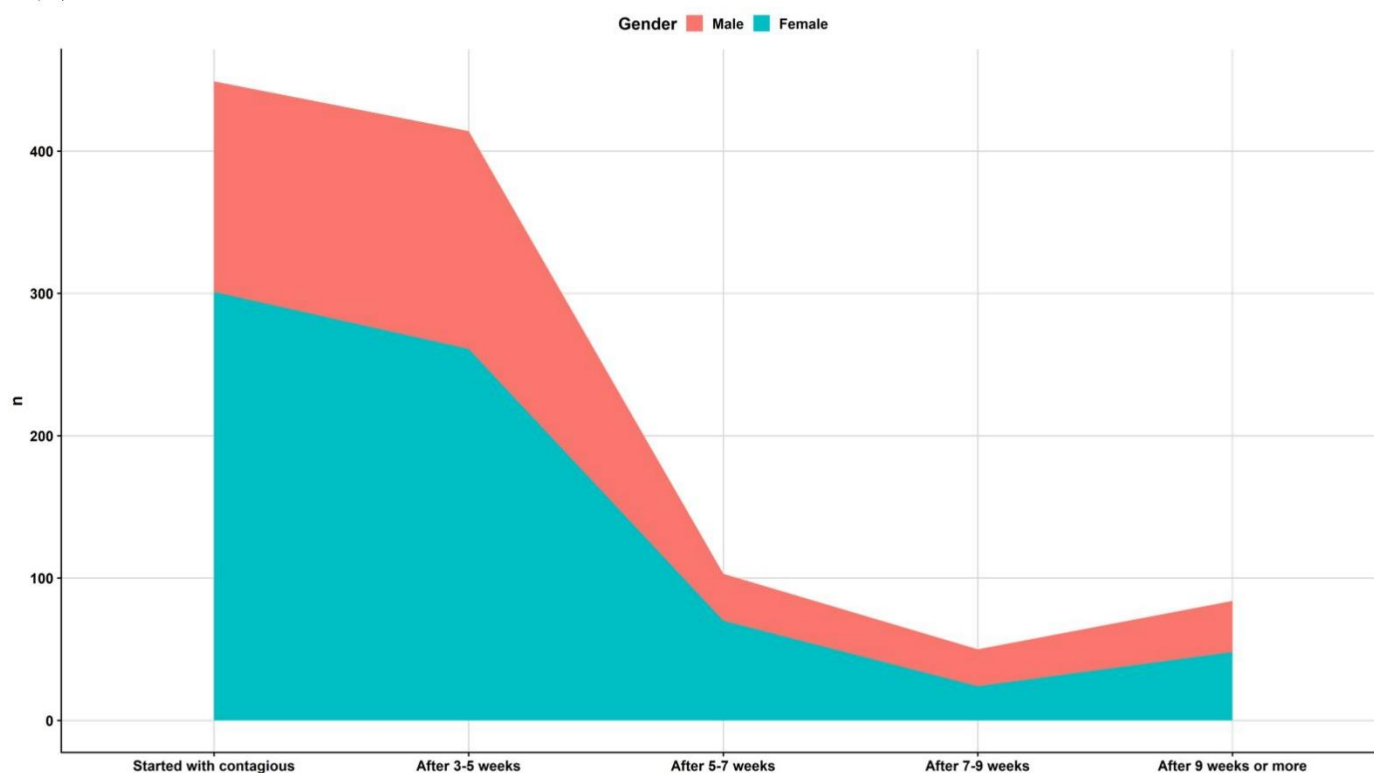

(B)

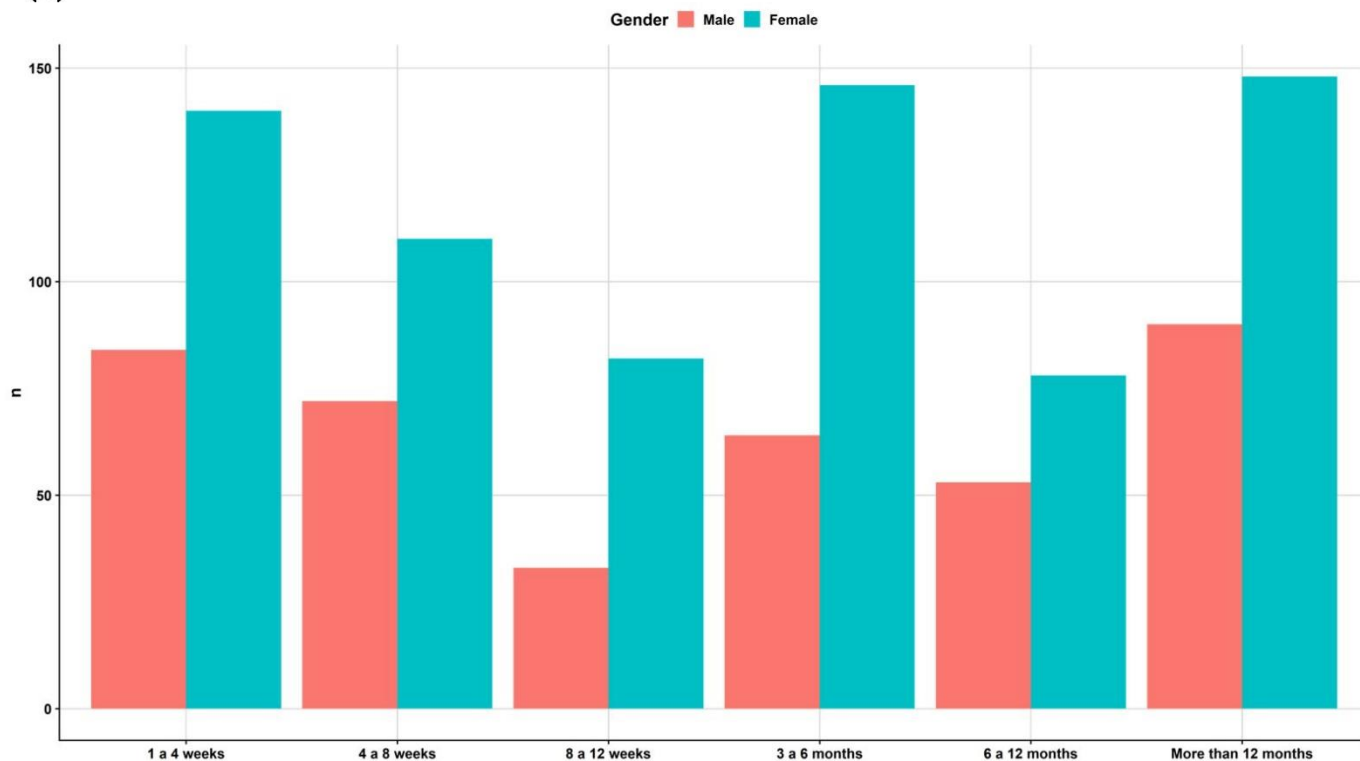

**Supplementary file S4.** Behavior of long-COVID symptoms according to sex. **(A).** Shows the frequency regarding the time of onset of self-referred symptoms from the onset of infection until after 9 weeks of infection. **(B).** Shows the frequency regarding the duration of symptoms.



Supplementary file S5. Distribution of COVID-19 post-acute symptom characteristics according to the characteristics of Ecuadorian participants.

| Symptoms                                  | Onset time n (%)         |                              |                              |                              |                        | Symptoms duration n (%) |                      |                      |                       |                         |                         |             |         |                           |                      | Frequency of presentation n (%) |                    |                    |                   |                   |                   |                                 |            |            |                     | Symptoms evolution n (%) |  |  |  |  |
|-------------------------------------------|--------------------------|------------------------------|------------------------------|------------------------------|------------------------|-------------------------|----------------------|----------------------|-----------------------|-------------------------|-------------------------|-------------|---------|---------------------------|----------------------|---------------------------------|--------------------|--------------------|-------------------|-------------------|-------------------|---------------------------------|------------|------------|---------------------|--------------------------|--|--|--|--|
|                                           | Initiated with infection | 3 to 5 weeks after infection | 5 to 7 weeks after infection | 7 to 9 weeks after infection | > 9 weeks of infection | p Value                 | Between 1 to 4 weeks | Between 4 to 8 weeks | Between 8 to 12 weeks | Between 12 to 16 months | Between 16 to 24 months | > 24 months | p Value | Days away from daily life | Once every two weeks | Once every month                | Once every 15 days | Once every 10 days | Once every 7 days | Once every 5 days | Once every 3 days | Intermittent (appear-disappear) | Got better | Improved   | Has been consistent | p Value                  |  |  |  |  |
| Alopecia                                  | 8 (25)                   | 15 (46.9)                    | 1 (3.1)                      | 4 (12.5)                     | 4 (12.5)               | 0.4                     | 2 (6.2)              | 4 (12.5)             | 4 (12.5)              | 7 (21.9)                | 5 (15.6)                | 10 (31.4)   | 0.3     | 2 (6.1)                   | 5 (15)               | --                              | 4 (12.5)           | 3 (9)              | 1 (3)             | 1 (3)             | 1 (3)             | 9 (28.1)                        | 5 (15.6)   | 9 (27.9)   | 9 (28.1)            | 0.3                      |  |  |  |  |
| Taste dysfunction                         | 98 (49.2)                | 57 (28.6)                    | 19 (9.5)                     | 10 (5)                       | 15 (7.5)               | 0.8                     | 23 (11.6)            | 29 (14.6)            | 14 (7)                | 36 (18.1)               | 35 (17.6)               | 62 (31)     | 0.5     | 21 (10.5)                 | 40 (20)              | 19 (9.5)                        | 14 (7)             | 14 (7)             | 14 (7)            | 14 (7)            | 14 (7)            | 52 (26.1)                       | 6 (3)      | 4 (2)      | 53 (26.6)           | 0.3                      |  |  |  |  |
| Alterations in glucose                    | 5 (31.2)                 | 5 (31.2)                     | 4 (25)                       | --                           | 2 (12.5)               | 0.1                     | 2 (12.5)             | 4 (25)               | 1 (6.2)               | 4 (25)                  | 2 (12.5)                | 3 (18.8)    | 0.8     | 3 (25)                    | 4 (25)               | --                              | --                 | --                 | --                | --                | --                | 2 (12.5)                        | 1 (6.2)    | 1 (6.2)    | 3 (18.8)            | 0.1                      |  |  |  |  |
| Menstrual cycle alterations               | 51 (43.2)                | 46 (39)                      | 12 (10.2)                    | 3 (2.5)                      | 6 (5.1)                | 0.6                     | 17 (14.4)            | 14 (11.9)            | 18 (15.3)             | 34 (28.8)               | 12 (10.2)               | 23 (19.4)   | 0.5     | 33 (28)                   | 30 (25.4)            | 10 (8.5)                        | 10 (8.5)           | 10 (8.5)           | 10 (8.5)          | 10 (8.5)          | 38 (32.2)         | 3 (2.5)                         | 2 (2)      | 39 (33.1)  | 0.5                 |                          |  |  |  |  |
| Hallucinations                            | 8 (40)                   | 6 (30)                       | 2 (10)                       | 2 (10)                       | 2 (10)                 | 0.7                     | 2 (10)               | 5 (25)               | 3 (15)                | 2 (10)                  | 3 (15)                  | 5 (25)      | 0.2     | 6 (30)                    | 5 (25)               | --                              | --                 | --                 | --                | --                | --                | 8 (40)                          | 3 (15)     | 4 (20)     | 5 (25)              | 0.9                      |  |  |  |  |
| Anxiety                                   | 146 (38.5)               | 150 (39.6)                   | 46 (12.1)                    | 13 (3.4)                     | 24 (6.3)               | 0.6                     | 69 (18.2)            | 53 (14)              | 49 (12.9)             | 74 (19.5)               | 46 (12.1)               | 88 (23.2)   | 0.4     | 106 (28)                  | 99 (25.1)            | 27 (7.1)                        | 32 (8.4)           | 32 (8.4)           | 32 (8.4)          | 32 (8.4)          | 116 (30.6)        | 20 (5.3)                        | 3 (1)      | 129 (34)   | 0.6                 |                          |  |  |  |  |
| Brittle hair                              | 42 (37.8)                | 44 (39.6)                    | 14 (12.6)                    | 4 (3.6)                      | 7 (6.3)                | 0.7                     | 10 (9)               | 15 (13.5)            | 20 (18)               | 27 (24.3)               | 16 (14.4)               | 23 (20.7)   | 0.8     | 32 (28)                   | 25 (22.5)            | 10 (9)                          | 11 (9.9)           | 11 (9.9)           | 11 (9.9)          | 11 (9.9)          | 38 (34.2)         | 8 (7.4)                         | 2 (3)      | 38 (34.2)  | 0.5                 |                          |  |  |  |  |
| Mood changes                              | 92 (39.3)                | 94 (40.2)                    | 30 (12.8)                    | 6 (2.6)                      | 12 (5.1)               | 0.5                     | 52 (22.2)            | 38 (16.2)            | 25 (10.7)             | 35 (15)                 | 26 (11.1)               | 58 (24.8)   | 0.4     | 70 (29.9)                 | 61 (26.1)            | 17 (7.3)                        | 17 (7.3)           | 17 (7.3)           | 17 (7.3)          | 17 (7.3)          | 76 (32.5)         | 16 (6.8)                        | 7 (8)      | 77 (32.9)  | 0.9                 |                          |  |  |  |  |
| Tachycardia                               | 72 (39.1)                | 80 (43.5)                    | 18 (9.8)                     | 7 (3.8)                      | 7 (3.8)                | 0.1                     | 27 (14.7)            | 30 (16.3)            | 14 (7.6)              | 40 (21.7)               | 25 (13.6)               | 48 (26.2)   | 0.2     | 57 (31)                   | 53 (28.8)            | 11 (6)                          | 15 (8.2)           | 15 (8.2)           | 15 (8.2)          | 15 (8.2)          | 67 (36.4)         | 10 (5.8)                        | 2 (4)      | 54 (29.3)  | 0.4                 |                          |  |  |  |  |
| Blood pressure changes                    | 27 (36.5)                | 29 (39.2)                    | 6 (8.1)                      | 7 (9.5)                      | 5 (6.8)                | 0.3                     | 10 (13.5)            | 13 (17.6)            | 9 (12.2)              | 15 (20.3)               | 8 (10.8)                | 19 (25.7)   | 0.9     | 24 (32)                   | 17 (23)              | 5 (6.8)                         | 5 (6.8)            | 5 (6.8)            | 5 (6.8)           | 5 (6.8)           | 23 (31.1)         | 3 (4)                           | 2 (4)      | 24 (32.4)  | 0.6                 |                          |  |  |  |  |
| Confusion                                 | 28 (45.9)                | 19 (31.1)                    | 9 (14.8)                     | 1 (1.6)                      | 4 (6.6)                | 0.3                     | 10 (16.4)            | 7 (11.5)             | 6 (9.8)               | 9 (14.8)                | 5 (8.2)                 | 24 (39.3)   | 0.6     | 19 (31)                   | 17 (27.9)            | 5 (8.2)                         | 4 (6)              | 4 (6)              | 4 (6)             | 4 (6)             | 16 (26.2)         | 6 (9.2)                         | 3 (8)      | 19 (31.1)  | 0.3                 |                          |  |  |  |  |
| Diarrhea                                  | 32 (57.1)                | 14 (25)                      | 8 (14.3)                     | 1 (1.8)                      | 1 (1.8)                | 0.2                     | 13 (23.2)            | 4 (7.1)              | 4 (7.1)               | 10 (17.9)               | 13 (23.2)               | 12 (21.4)   | 0.5     | 12 (21.4)                 | 12 (21.4)            | 3 (5.4)                         | 11 (19.6)          | 11 (19.6)          | 11 (19.6)         | 11 (19.6)         | 19 (33.9)         | 5 (8.2)                         | 2 (9)      | 14 (25)    | 0.6                 |                          |  |  |  |  |
| Difficulty concentrating                  | 161 (41.6)               | 145 (37.5)                   | 45 (11.6)                    | 11 (2.8)                     | 25 (6.5)               | 0.8                     | 61 (15.8)            | 51 (13.2)            | 43 (11.1)             | 82 (21.2)               | 48 (12.4)               | 102 (26.4)  | 0.7     | 116 (30)                  | 80 (20.7)            | 37 (9.6)                        | 31 (8)             | 31 (8)             | 31 (8)            | 31 (8)            | 118 (30.5)        | 22 (5.7)                        | 3 (7)      | 118 (30.5) | 0.3                 |                          |  |  |  |  |
| Speech disturbance                        | 98 (40.7)                | 90 (37.3)                    | 28 (11.6)                    | 7 (2.9)                      | 18 (7.5)               | 0.4                     | 29 (12)              | 31 (12.9)            | 30 (12.4)             | 53 (22)                 | 34 (14.1)               | 64 (26.6)   | 0.5     | 83 (34.9)                 | 48 (19.9)            | 26 (10.8)                       | 11 (4.6)           | 11 (4.6)           | 11 (4.6)          | 11 (4.6)          | 81 (33.6)         | 14 (5.8)                        | 7 (8)      | 72 (29.9)  | 0.1                 |                          |  |  |  |  |
| Decreased visual acuity                   | 53 (36.1)                | 56 (38.1)                    | 22 (15)                      | 6 (4.1)                      | 10 (6.8)               | 0.1                     | 13 (8.8)             | 13 (8.8)             | 12 (8.2)              | 30 (20.4)               | 24 (16.3)               | 55 (37.4)   | 0.2     | 41 (27.9)                 | 40 (27.2)            | 9 (6.1)                         | 9 (6.1)            | 9 (6.1)            | 9 (6.1)           | 9 (6.1)           | 52 (35.4)         | 10 (6.8)                        | 2 (2)      | 48 (32.7)  | 0.2                 |                          |  |  |  |  |
| Loss of muscle strength                   | 69 (40.6)                | 72 (42.4)                    | 16 (9.4)                     | 5 (2.9)                      | 8 (4.7)                | 0.3                     | 20 (11.8)            | 36 (21.2)            | 21 (12.4)             | 31 (18.2)               | 19 (11.2)               | 43 (25.3)   | 0.5     | 50 (29.4)                 | 47 (27.6)            | 15 (8.8)                        | 14 (8.2)           | 14 (8.2)           | 14 (8.2)          | 14 (8.2)          | 67 (39.4)         | 8 (4.8)                         | 2 (7)      | 47 (27.6)  | 0.8                 |                          |  |  |  |  |
| Decreased libido/sexual desire            | 38 (33)                  | 55 (47.8)                    | 9 (7.8)                      | 6 (5.2)                      | 7 (6.1)                | 0.1                     | 16 (13.9)            | 19 (16.5)            | 16 (13.9)             | 20 (17.4)               | 16 (13.9)               | 28 (24.3)   | 0.6     | 34 (30.6)                 | 35 (30.4)            | 10 (8.7)                        | 10 (8.7)           | 10 (8.7)           | 10 (8.7)          | 10 (8.7)          | 46 (40)           | 4 (5)                           | 3 (7)      | 34 (29.6)  | 0.3                 |                          |  |  |  |  |
| Abdominal pain                            | 30 (42.9)                | 24 (34.3)                    | 6 (8.6)                      | 3 (4.3)                      | 7 (10)                 | 0.9                     | 16 (22.9)            | 7 (10)               | 11 (15.7)             | 13 (18.6)               | 6 (8.6)                 | 17 (24.3)   | 0.4     | 22 (31)                   | 22 (31.4)            | 3 (4.3)                         | 6 (8.6)            | 6 (8.6)            | 6 (8.6)           | 6 (8.6)           | 28 (40)           | 2 (2.9)                         | 2 (9)      | 17 (24.3)  | 0.6                 |                          |  |  |  |  |
| Headache                                  | 161 (45.5)               | 118 (33.3)                   | 35 (9.9)                     | 15 (4.2)                     | 25 (7.1)               | 0.2                     | 79 (22.3)            | 61 (17.2)            | 36 (10.2)             | 68 (19.2)               | 37 (10.5)               | 73 (20.6)   | 0.7     | 107 (30.2)                | 85 (24)              | 29 (8.2)                        | 39 (11)            | 39 (11)            | 39 (11)           | 39 (11)           | 106 (29.9)        | 22 (6.3)                        | 3 (2)      | 108 (30.5) | 0.2                 |                          |  |  |  |  |
| Chest pain                                | 75 (40.1)                | 82 (43.9)                    | 15 (8)                       | 6 (3.2)                      | 9 (4.8)                | 0.1                     | 30 (16)              | 43 (23)              | 22 (11.8)             | 41 (21.9)               | 19 (10.2)               | 32 (17.1)   | 0.2     | 51 (27.3)                 | 56 (29.9)            | 12 (6.4)                        | 17 (9.1)           | 17 (9.1)           | 17 (9.1)          | 17 (9.1)          | 66 (35.3)         | 14 (7.8)                        | 3 (5)      | 54 (28.9)  | 0.0                 |                          |  |  |  |  |
| Burning sensation in any part of the body | 33 (44)                  | 29 (38.7)                    | 9 (12)                       | 1 (1.3)                      | 3 (4)                  | 0.4                     | 13 (17.3)            | 6 (8)                | 9 (12)                | 18 (24)                 | 8 (10.7)                | 21 (28.0)   | 0.6     | 26 (34.7)                 | 19 (25.3)            | 7 (9.3)                         | 5 (6.7)            | 5 (6.7)            | 5 (6.7)           | 5 (6.7)           | 24 (32)           | 6 (8)                           | 2 (8)      | 24 (32)    | 0.1                 |                          |  |  |  |  |

|                         |            |            |           |          |           |       |            |            |           |            |           |           |       |         |            |           |           |           |         |          |            |          |          |            |       |
|-------------------------|------------|------------|-----------|----------|-----------|-------|------------|------------|-----------|------------|-----------|-----------|-------|---------|------------|-----------|-----------|-----------|---------|----------|------------|----------|----------|------------|-------|
| Unusual muscle aches    | 48 (44)    | 38 (34.9)  | 11 (10.1) | 4 (3.7)  | 8 (7.3)   | 0.932 | 20 (18.3)  | 11 (10.1)  | 12 (11)   | 21 (19.3)  | 16 (14.7) | 29 (26.5) | 0.339 | 2 (2.9) | 6 (30.3)   | 25 (22.9) | 14 (12.8) | 7 (6.4)   | 4 (3.7) | 0.088    | 43 (39.4)  | 5 (4.6)  | 28 (2.7) | 33 (30.3)  | 0.444 |
|                         |            |            |           |          |           | 0.335 | 33 (20.1)  | 28 (17.1)  | 17 (10.4) | 29 (17.7)  | 23 (14)   | 34 (20.7) | 0.957 | 2 (2.4) | 33 (35.4)  | 35 (21.3) | 18 (11)   | 12 (7.3)  | 8 (.9)  | 0.066    | 50 (30.5)  | 13 (7.9) | 54 (3.2) | 47 (28.7)  | 0.121 |
| Usual muscle aches      | 59 (36)    | 60 (36.6)  | 20 (12.2) | 10 (6.1) | 15 (9.1)  | 0.172 | 12 (26.7)  | 4 (8.9)    | 10 (22.2) | 4 (8.9)    | 5 (11.1)  | 10 (22.2) | 0.094 | 2 (2.0) | 58 (35.4)  | 35 (21.3) | 18 (11)   | 12 (7.3)  | 8 (.9)  | 0.066    | 50 (30.5)  | 13 (7.9) | 54 (3.2) | 47 (28.7)  | 0.121 |
| Shaking chills          | 27 (60)    | 14 (31.1)  | 4 (8.9)   | --       | --        | 0.172 | 12 (26.7)  | 4 (8.9)    | 10 (22.2) | 4 (8.9)    | 5 (11.1)  | 10 (22.2) | 0.094 | 2 (2.0) | 58 (35.4)  | 35 (21.3) | 18 (11)   | 12 (7.3)  | 8 (.9)  | 0.066    | 50 (30.5)  | 13 (7.9) | 54 (3.2) | 47 (28.7)  | 0.121 |
| Sneezing                | 47 (51.1)  | 34 (37)    | 9 (9.8)   | --       | 2 (2.2)   | 0.178 | 24 (26.1)  | 15 (16.3)  | 11 (12)   | 10 (10.9)  | 14 (15.2) | 18 (19.5) | 0.259 | 1 (1.5) | 20 (21.7)  | 31 (33.7) | 6 (6.5)   | 9 (9.8)   | 9 (.8)  | 0.044    | 33 (35.9)  | 4 (4.3)  | 26 (2.8) | 29 (31.5)  | 0.358 |
| Fatigue or tiredness    | 271 (41.6) | 250 (38.3) | 69 (10.6) | 21 (3.2) | 41 (6.3)  | 0.171 | 143 (21.9) | 112 (17.2) | 75 (11.5) | 130 (19.9) | 70 (10.7) | 12 (18.7) | 0.257 | 2 (2.7) | 192 (29.4) | 13 (19.9) | 55 (8.4)  | 63 (9.7)  | 8 (5.0) | 0.111    | 193 (29.6) | 34 (5.2) | 22 (3.5) | 200 (30.7) | 0.461 |
| Tingling in extremities | 45 (32.8)  | 65 (47.4)  | 13 (9.5)  | 8 (5.8)  | 6 (4.4)   | 0.156 | 16 (11.7)  | 19 (13.9)  | 13 (9.5)  | 26 (19)    | 23 (16.8) | 40 (29.2) | 0.169 | 2 (2.1) | 39 (39.5)  | 42 (30.7) | 16 (11.7) | 4 (2.9)   | 6 (4.9) | 0.011    | 48 (35)    | 7 (5.1)  | 38 (2.7) | 44 (32.1)  | 0.181 |
| Insomnia                | 136 (39.8) | 139 (40.6) | 29 (8.5)  | 12 (3.5) | 26 (7.6)  | 0.157 | 62 (18.1)  | 46 (13.5)  | 35 (10.2) | 68 (19.9)  | 46 (13.5) | 85 (24.9) | 0.170 | 1 (1.4) | 108 (31.6) | 66 (19.3) | 22 (6.4)  | 27 (7.9)  | 4 (0.6) | 0.066    | 91 (26.6)  | 22 (6.4) | 11 (3.5) | 118 (34.5) | 0.095 |
| Heat intolerance        | 8 (40)     | 7 (35)     | 3 (15)    | 1 (5)    | 1 (5)     | 0.192 | 2 (10)     | 1 (5)      | 3 (15)    | 4 (20)     | 1 (5)     | 9 (45.0)  | 0.150 | 2 (2.0) | 8 (40)     | 5 (25)    | 2 (10)    | 1 (5)     | --      | 0.559    | 9 (45)     | 1 (5)    | 4 (0)    | 6 (30)     | 0.353 |
| Cold intolerance        | 38 (41.3)  | 30 (32.6)  | 13 (14.1) | 1 (1.1)  | 10 (10.9) | 0.112 | 14 (15.2)  | 9 (9.8)    | 4 (4.3)   | 22 (23.9)  | 16 (17.4) | 27 (29.3) | 0.145 | 1 (1.7) | 35 (38)    | 21 (22.8) | 10 (10.9) | 4 (4.3)   | 2 (0.2) | 0.127    | 27 (29.3)  | 7 (7.6)  | 3 (3.7)  | 27 (29.3)  | 0.131 |
| Nausea                  | 34 (50)    | 25 (36.8)  | 6 (8.8)   | --       | 3 (4.4)   | 0.159 | 12 (17.6)  | 8 (11.8)   | 10 (14.7) | 10 (14.7)  | 11 (16.2) | 17 (25.0) | 0.849 | 2 (2.5) | 15 (22.1)  | 20 (29.4) | 4 (5.9)   | 9 (13.2)  | 2 (0.9) | 0.666    | 21 (30.9)  | 2 (2.9)  | 26 (8.2) | 19 (27.9)  | 0.890 |
| Neuritis                | 36 (37.5)  | 39 (40.6)  | 13 (13.5) | 3 (3.1)  | 5 (5.2)   | 0.437 | 12 (12.5)  | 18 (18.8)  | 8 (8.3)   | 20 (20.8)  | 10 (10.4) | 28 (29.2) | 0.251 | 2 (2.5) | 33 (33.3)  | 19 (9.8)  | 9 (9.4)   | 6 (6.2)   | 1 (0.1) | 0.527    | 27 (28.1)  | 7 (7.3)  | 30 (3.2) | 32 (33.3)  | 0.495 |
| Palpitations            | 71 (39)    | 72 (39.6)  | 15 (8.2)  | 7 (3.8)  | 17 (9.3)  | 0.728 | 29 (15.9)  | 32 (17.6)  | 21 (11.5) | 36 (19.8)  | 24 (13.2) | 40 (22.2) | 0.522 | 2 (2.7) | 55 (30.2)  | 43 (23.6) | 14 (7.7)  | 15 (8.2)  | 5 (0.5) | 0.764    | 64 (35.2)  | 14 (7.1) | 57 (3.3) | 47 (25.8)  | 0.011 |
| Facial paralysis        | 3 (42.9)   | 3 (42.9)   | --        | --       | 1 (14.3)  | 0.875 | 2 (28.6)   | 1 (14.3)   | --        | --         | --        | 4 (57.1)  | 0.599 | 4 (2.9) | 14 (3.3)   | 2 (0.6)   | --        | --        | 4 (0.3) | 0.522    | 2 (28.6)   | --       | 2 (9)    | 2 (28.6)   | 0.464 |
| Loss of appetite        | 32 (58.2)  | 19 (34.5)  | 2 (3.6)   | 1 (1.8)  | 1 (1.8)   | 0.041 | 11 (20)    | 6 (10.9)   | 9 (16.4)  | 12 (21.8)  | 5 (9.1)   | 12 (21.8) | 0.599 | 2 (2.1) | 15 (27.3)  | 11 (20.3) | 3 (5.5)   | 4 (7.3)   | 6 (0.9) | 0.817    | 17 (30.9)  | 3 (5.0)  | 3 (3.9)  | 18 (32.7)  | 0.950 |
| Hearing loss            | 18 (36.7)  | 21 (42.9)  | 7 (14.3)  | --       | 3 (6.1)   | 0.601 | 4 (8.2)    | 3 (6.1)    | 7 (14.3)  | 13 (26.5)  | 5 (10.2)  | 17 (34.7) | 0.319 | 3 (3.6) | 13 (26.5)  | 13 (26.5) | 6 (12.2)  | 1 (2)     | 1 (0.2) | 0.255    | 15 (30.6)  | 2 (4.1)  | 14 (8.6) | 18 (36.7)  | 0.746 |
| Hair loss               | 146 (37.3) | 154 (39.4) | 40 (10.2) | 19 (4.9) | 32 (8.2)  | 0.533 | 53 (13.6)  | 52 (13.3)  | 48 (12.3) | 83 (21.2)  | 54 (13.8) | 10 (25.8) | 0.701 | 2 (2.4) | 108 (27.6) | 87 (22.3) | 31 (7.9)  | 34 (8.7)  | 1 (0.1) | 0.5115   | 115 (29.4) | 14 (3.6) | 13 (3.5) | 125 (32)   | 0.698 |
| Loss of taste           | 92 (53.5)  | 49 (28.5)  | 18 (10.5) | 4 (2.3)  | 9 (5.2)   | 0.002 | 24 (14)    | 22 (12.8)  | 20 (11.6) | 21 (12.2)  | 28 (16.3) | 57 (33.1) | 0.311 | 3 (3.4) | 40 (23.3)  | 35 (20.3) | 11 (6.4)  | 16 (9.3)  | 6 (0.3) | 0.750    | 50 (29.1)  | 8 (7.4)  | 66 (3.8) | 48 (27.9)  | 0.726 |
| Memory deficits         | 113 (39.4) | 103 (35.9) | 33 (11.5) | 13 (4.5) | 25 (8.7)  | 0.559 | 30 (10.5)  | 40 (13.9)  | 31 (10.8) | 59 (20.6)  | 45 (15.7) | 82 (28.6) | 0.041 | 2 (2.4) | 102 (35.9) | 60 (20.9) | 27 (9.4)  | 16 (5.6)  | 4 (0.2) | 0.011    | 91 (31.7)  | 14 (4.3) | 96 (3.3) | 86 (30)    | 0.585 |
| Muscle loss             | 47 (48.5)  | 35 (36.1)  | 10 (10.3) | 2 (2.1)  | 3 (3.1)   | 0.198 | 10 (10.3)  | 10 (10.3)  | 10 (10.3) | 20 (20.6)  | 16 (16.5) | 31 (32.0) | 0.201 | 1 (1.7) | 35 (36.1)  | 22 (7.7)  | 8 (8.2)   | 2 (1)     | 6 (0.2) | 0.0531   | 31 (32)    | 7 (2)    | 37 (3.1) | 22 (22.7)  | 0.183 |
| Loss of smell           | 135 (51.3) | 76 (28.9)  | 27 (10.3) | 8 (3)    | 17 (6.5)  | 0.011 | 46 (17.5)  | 29 (11)    | 26 (9.9)  | 43 (16.3)  | 40 (15.2) | 79 (30.0) | 0.311 | 3 (3.9) | 65 (24.8)  | 52 (19.8) | 18 (6.8)  | 19 (7.2)  | 5 (0.5) | 0.305    | 67 (25.5)  | 12 (4.6) | 11 (3.3) | 71 (27)    | 0.088 |
| Body hair loss          | 4 (28.6)   | 6 (42.9)   | 2 (14.3)  | --       | 2 (14.3)  | 0.636 | 2 (14.3)   | 2 (14.3)   | 2 (14.3)  | 1 (7.1)    | 1 (7.1)   | 6 (42.9)  | 0.434 | 2 (2.4) | 8 (57.1)   | 1 (7.1)   | --        | 2 (14.3)  | 0.14    | 3 (21.4) | 1 (7.1)    | 1 (0.1)  | 9 (64.3) | 0.036      |       |
| Pruritus (itching)      | 45 (39.5)  | 47 (41.2)  | 12 (10.5) | 5 (4.4)  | 5 (4.4)   | 0.654 | 14 (12.3)  | 19 (16.7)  | 13 (11.4) | 24 (21.1)  | 15 (13.2) | 29 (25.4) | 0.961 | 2 (2.4) | 34 (29.8)  | 26 (22.8) | 11 (9.6)  | 11 (9.6)  | 3 (0.6) | 0.746    | 46 (40.4)  | 10 (8.1) | 25 (2.9) | 33 (28.9)  | 0.010 |
| Gastroesophageal reflux | 30 (34.5)  | 40 (46)    | 6 (6.9)   | 2 (2.3)  | 9 (10.3)  | 0.266 | 16 (18.4)  | 21 (24.1)  | 3 (3.4)   | 15 (17.2)  | 12 (13.8) | 20 (23.3) | 0.131 | 2 (2.8) | 27 (31)    | 28 (2.2)  | 4 (4.6)   | 6 (6.9)   | 3 (0.4) | 0.019    | 34 (39.1)  | 1 (1.2)  | 3 (3.2)  | 24 (27.6)  | 0.085 |
| Skin dryness            | 63 (45.3)  | 46 (33.1)  | 15 (10.8) | 3 (2.2)  | 12 (8.6)  | 0.378 | 23 (16.5)  | 17 (12.2)  | 19 (13.7) | 32 (23)    | 22 (15.8) | 26 (18.7) | 0.122 | 2 (2.3) | 46 (33.1)  | 27 (19.4) | 15 (10.8) | 16 (11.5) | 4 (0.9) | 0.299    | 50 (36)    | 9 (6.5)  | 33 (3.7) | 47 (33.8)  | 0.144 |
| Thirst                  | 31 (40.3)  | 30 (39)    | 7 (9.1)   | 5 (6.5)  | 4 (5.2)   | 0.846 | 14 (18.2)  | 20 (26)    | 9 (11.7)  | 14 (18.2)  | 6 (7.8)   | 14 (18.2) | 0.526 | 2 (2.6) | 18 (23.3)  | 29 (37.7) | 9 (11.7)  | 5 (6.5)   | 1 (0.3) | 0.011    | 34 (44.2)  | 3 (3.9)  | 20 (6)   | 20 (26)    | 0.221 |

|                           |               |              |              |            |             |               |              |              |              |              |              |              |              |              |              |              |             |              |            |              |              |              |             |              |              |
|---------------------------|---------------|--------------|--------------|------------|-------------|---------------|--------------|--------------|--------------|--------------|--------------|--------------|--------------|--------------|--------------|--------------|-------------|--------------|------------|--------------|--------------|--------------|-------------|--------------|--------------|
| Easy crying               | 79<br>(39.1)  | 80<br>(39.6) | 26<br>(12.9) | 3 (1.5)    | 14<br>(6.9) | 0.0<br>(2.2)  | 35<br>(17.3) | 29<br>(14.4) | 30<br>(14.9) | 33<br>(16.3) | 24<br>(11.9) | 51<br>(25.2) | 0.1<br>(2.3) | 4.6<br>(2.8) | 62<br>(30.7) | 53<br>(26.2) | 18<br>(8.9) | 15<br>(7.4)  | 8<br>(4.0) | 0.0<br>(0.9) | 75<br>(37.1) | 12<br>(5.9)  | 60<br>(2.9) | 55<br>(27.2) | 0.0<br>(1.3) |
| Excessive sweating        | 41<br>(45.6)  | 32<br>(35.6) | 8 (8.9)      | 4 (4.4)    | 5 (5.6)     | 0.7<br>(2.2)  | 11<br>(12.2) | 16<br>(17.8) | 10<br>(11.1) | 23<br>(25.6) | 9 (10)       | 21<br>(23.3) | 0.3<br>(1.1) | 8.3<br>(3.1) | 29<br>(32.2) | 14<br>(15.6) | 6 (6.7)     | 9<br>(10.4)  | 4<br>(4.4) | 0.7<br>(0.9) | 25<br>(27.8) | 2 (2.2)      | 37<br>(4.1) | 26<br>(28.9) | 0.5<br>(1.2) |
| Tremor of the extremities | 33<br>(36.7)  | 40<br>(44.4) | 7 (7.8)      | 4 (4.4)    | 6 (6.7)     | 0.3<br>(4.4)  | 15<br>(16.7) | 11<br>(12.2) | 13<br>(14.4) | 13<br>(14.4) | 13<br>(14.4) | 25<br>(27.8) | 0.1<br>(2.5) | 1.8<br>(0.4) | 31<br>(34.4) | 21<br>(23.3) | 8 (8.9)     | 8<br>(8.9)   | 4<br>(4.4) | 0.2<br>(1.8) | 28<br>(31.1) | 11<br>(12.2) | 25<br>(2.7) | 26<br>(28.9) | 0.0<br>(2.2) |
| Persistent cough          | 127<br>(51.8) | 86<br>(35.1) | 13<br>(5.3)  | 6 (2.4)    | 13<br>(5.3) | 0.0<br>(28.6) | 70<br>(23.3) | 57<br>(11.4) | 28<br>(16.3) | 40<br>(8.6)  | 21<br>(8.6)  | 29<br>(11.8) | 0.3<br>(3.1) | 3.9<br>(9.7) | 63<br>(25.7) | 54<br>(22.1) | 15<br>(6.1) | 17<br>(9.9)  | 5<br>(5.3) | 0.3<br>(3.7) | 81<br>(33.1) | 13<br>(5.3)  | 83<br>(3.9) | 68<br>(27.8) | 0.6<br>(4.4) |
| Brittle nails             | 56<br>(49.6)  | 36<br>(31.9) | 12<br>(10.6) | 4 (3.5)    | 5 (4.4)     | 0.2<br>(2.5)  | 18<br>(15.9) | 13<br>(11.5) | 21<br>(18.6) | 24<br>(21.2) | 15<br>(13.3) | 22<br>(19.3) | 0.4<br>(3.1) | 3.0<br>(6.1) | 29<br>(25.7) | 24<br>(21.2) | 6 (5.3)     | 15<br>(13.3) | 5<br>(4.4) | 0.4<br>(1.1) | 39<br>(34.5) | 5 (4.4)      | 28<br>(2.8) | 41<br>(36.3) | 0.9<br>(2.2) |
| Vomit                     | 15<br>(60)    | 5 (20)       | 4 (16)       | --         | 1 (4)       | 0.1<br>(2.4)  | 6 (24)       | 2 (8)        | 4 (16)       | 4 (16)       | 5 (20)       | 4<br>(16.5)  | 0.5<br>(1.6) | 4.6<br>(6.2) | 9<br>(16.4)  | 9<br>(36.1)  | 1 (4)       | 6<br>(24.4)  | 1<br>(4.4) | 0.1<br>(1.7) | 8 (32)       | --           | 9<br>(3.6)  | 8<br>(32)    | 0.7<br>(8.8) |
| <b>Total</b>              | <b>3257</b>   | <b>2911</b>  | <b>808</b>   | <b>268</b> | <b>502</b>  | <b>1297</b>   | <b>1156</b>  | <b>889</b>   | <b>1503</b>  | <b>1002</b>  | <b>1899</b>  | <b>0.3</b>   | <b>228</b>   | <b>18</b>    | <b>626</b>   | <b>632</b>   | <b>38</b>   | <b>2486</b>  | <b>43</b>  | <b>81</b>    | <b>2346</b>  |              |             |              |              |

**Supplementary file S6.** Distribution of long-COVID symptoms characteristics according to the characteristics of Ecuadorian participants.

| Characteristics           |                              | Comorbidities n (%) |            |            |            |            |           |            |           |          |         |              |            |            |             |             |            |            |            |                     | Ethnicity n (%)      |          |  |  |  | Vaccine |  |  |  |  | 2 doses + 2 boosters |  | p Va lue |
|---------------------------|------------------------------|---------------------|------------|------------|------------|------------|-----------|------------|-----------|----------|---------|--------------|------------|------------|-------------|-------------|------------|------------|------------|---------------------|----------------------|----------|--|--|--|---------|--|--|--|--|----------------------|--|----------|
|                           |                              | To tal n            | Sex n (%)  |            |            | p Va lue   | No        | Yes        | p Va lue  | Af ro    | W hit e | Indi geno us | Mes tizo   | Mo ntu bio | Ot he r     | p Va lue    | No         | 1 do se    | 2 dos es   | 2 doses + 1 booster | 2 doses + 2 boosters | p Va lue |  |  |  |         |  |  |  |  |                      |  |          |
|                           |                              |                     | Mal e      | Fe mal e   | p Va lue   |            |           |            |           |          |         |              |            |            |             |             |            |            |            |                     |                      |          |  |  |  |         |  |  |  |  |                      |  |          |
| Onset time                | Initiated with infection     | 44 (33.9)           | 148 (67.0) | 301 (67.0) | 0.0 (93.0) | 359 (80.0) | 90 (20.0) | 0.4 (52.7) | 3 (0.6)   | 27 (6.0) | 6 (1.3) | 406 (90.4)   | 5 (1.1)    | 2 (0.5)    | 0.3 (82.0)  | 2 (0.5)     | 2 (0.5)    | 68 (15.1)  | 323 (71.9) | 56 (12.5)           | 0.7 (53.0)           |          |  |  |  |         |  |  |  |  |                      |  |          |
|                           | 3 to 5 weeks after infection | 41 (37.4)           | 153 (63.0) | 261 (63.0) | 0.6 (54.3) | 320 (77.3) | 94 (22.7) | 0.4 (09.5) | 1 (0.3)   | 26 (3.3) | 1 (0.2) | 382 (92.3)   | 2 (0.5)    | 1 (0.2)    | 0.1 (98.0)  | 1 (97.0)    | 1 (15.2)   | 296 (71.5) | 55 (13.3)  | 0.9 (06.0)          |                      |          |  |  |  |         |  |  |  |  |                      |  |          |
|                           | 5 to 7 weeks after infection | 10 (32.3)           | 33 (68.0)  | 70 (68.0)  | 0.4 (4.6)  | 83 (80.4)  | 20 (19.4) | 0.7 (21.0) | 1 (1.0)   | 1 (0.0)  | 1 (0.0) | 98 (95.2)    | 3 (2.9)    | 0.0 (0.0)  | 0.0 (88.97) | 0.0 (1.0)   | 1 (14.6)   | 69 (67.0)  | 17 (16.5)  | 0.0 (1.1)           |                      |          |  |  |  |         |  |  |  |  |                      |  |          |
|                           | 7 to 9 weeks after infection | 50 (52.0)           | 26 (48.0)  | 24 (48.0)  | 0.0 (23.0) | 82 (82.0)  | 18 (18.0) | 0.6 (88.0) | 0 (0.0)   | 2 (0.0)  | 0 (0.0) | 92 (92.0)    | 4 (4.0)    | 2 (2.0)    | 0.0 (56.0)  | 0.0 (0.0)   | 0 (30.0)   | 32 (64.0)  | 3 (6.0)    | 0.0 (1.1)           |                      |          |  |  |  |         |  |  |  |  |                      |  |          |
|                           | After 9 weeks of infection   | 84 (42.9)           | 36 (57.1)  | 48 (57.1)  | 0.2 (13.0) | 75 (75.0)  | 25 (25.0) | 0.4 (65.0) | 4 (4.8)   | 1 (1.2)  | 1 (1.2) | 90 (90.5)    | 3 (3.6)    | 0.3 (0.3)  | 0.3 (14.14) | 0.3 (14.14) | 12 (14.3)  | 61 (72.6)  | 11 (13.1)  | 0.9 (26.0)          |                      |          |  |  |  |         |  |  |  |  |                      |  |          |
|                           | Symptoms duration            | 84 (37.4)           | 84 (62.5)  | 140 (62.5) | 0.6 (56.7) | 174 (77.3) | 50 (22.3) | 0.7 (35.7) | 1 (0.5)   | 12 (5.4) | 3 (1.3) | 207 (92.4)   | 1 (0.5)    | 0.5 (0.18) | 0.5 (0.18)  | 0.5 (0.18)  | 1 (13.0)   | 167 (74.6) | 28 (12.5)  | 0.3 (85.0)          |                      |          |  |  |  |         |  |  |  |  |                      |  |          |
|                           | Between 1 to 4 weeks         | 22 (37.4)           | 18 (39.6)  | 57 (60.4)  | 0.3 (12.5) | 76 (83.5)  | 21 (22.5) | 0.1 (03.5) | 0 (0.0)   | 3 (3.3)  | 2 (2.2) | 87 (93.9)    | 0.6 (0.9)  | 0.0 (0.6)  | 0.1 (0.33)  | 0.0 (0.55)  | 1 (17.0)   | 124 (68.1) | 26 (14.3)  | 0.1 (19.0)          |                      |          |  |  |  |         |  |  |  |  |                      |  |          |
|                           | Between 4 to 8 weeks         | 2 (39.6)            | 6 (60.4)   | 4 (40.0)   | 0.0 (0.0)  | 5 (55.6)   | 0 (0.0)   | 0.0 (0.0)  | 0 (0.0)   | 0 (0.0)  | 0 (0.0) | 93 (93.0)    | 0.9 (0.9)  | 0.8 (0.8)  | 0.8 (0.8)   | 0.8 (0.8)   | 74 (92.5)  | 85 (73.9)  | 14 (12.2)  | 0.7 (89.0)          |                      |          |  |  |  |         |  |  |  |  |                      |  |          |
| Frequency of presentation | Between 8 to 12 weeks        | 11 (28.5)           | 33 (71.5)  | 82 (71.5)  | 0.1 (05.1) | 91 (79.1)  | 24 (20.9) | 0.9 (99.9) | 0.0 (0.0) | 1 (1.0)  | 9 (9.0) | 197 (93.8)   | 2 (1.0)    | 1 (0.5)    | 0.0 (0.0)   | 0.0 (0.0)   | 1 (12.5)   | 154 (73.3) | 28 (13.3)  | 0.5 (75.0)          |                      |          |  |  |  |         |  |  |  |  |                      |  |          |
|                           | Between 3 to 6 months        | 21 (30.0)           | 64 (69.0)  | 146 (69.0) | 0.0 (76.7) | 161 (76.3) | 49 (23.3) | 0.4 (73.5) | 0 (0.0)   | 4 (4.4)  | 3 (3.3) | 119 (90.8)   | 4 (3.1)    | 1 (0.8)    | 0.4 (0.16)  | 0.4 (0.16)  | 23 (17.6)  | 92 (70.2)  | 16 (12.2)  | 0.8 (26.0)          |                      |          |  |  |  |         |  |  |  |  |                      |  |          |
|                           | Between 6 to 12 months       | 13 (40.0)           | 5 (50.0)   | 59 (59.0)  | 0.3 (01.2) | 80 (85.5)  | 19 (20.9) | 0.7 (55.5) | 0.0 (0.0) | 4 (4.4)  | 6 (6.6) | 90 (89.8)    | 3 (3.1)    | 0.0 (0.8)  | 0.4 (0.16)  | 0.4 (0.16)  | 17 (16.6)  | 92 (70.2)  | 16 (12.2)  | 0.8 (26.0)          |                      |          |  |  |  |         |  |  |  |  |                      |  |          |
|                           | More than 12 months          | 23 (37.8)           | 90 (62.2)  | 148 (62.2) | 0.5 (6.9)  | 183 (76.3) | 55 (23.3) | 0.4 (89.1) | 0.0 (0.0) | 1 (1.3)  | 3 (3.8) | 2 (2.6)      | 217 (91.2) | 6 (2.5)    | 1 (0.4)     | 0.1 (0.97)  | 0.1 (0.97) | 2 (24.8)   | 159 (66.8) | 30 (12.6)           | 0.0 (58.0)           |          |  |  |  |         |  |  |  |  |                      |  |          |
|                           | Once a month                 | 97 (41.2)           | 40 (58.8)  | 57 (58.8)  | 0.3 (1.4)  | 76 (78.7)  | 21 (21.7) | 0.9 (99.7) | 0.0 (0.0) | 4 (4.1)  | 4 (4.1) | 91 (93.8)    | 2 (2.1)    | 0.7 (0.4)  | 0.7 (0.4)   | 0.7 (0.4)   | 15 (15.5)  | 68 (70.1)  | 14 (14.4)  | 0.9 (02.0)          |                      |          |  |  |  |         |  |  |  |  |                      |  |          |
|                           | Once every two weeks         | 84 (35.7)           | 30 (35.7)  | 64 (64.3)  | 0.9 (99.3) | 83 (83.3)  | 16 (16.7) | 0.3 (49.7) | 0.0 (0.0) | 1 (1.2)  | 7 (7.1) | 1 (1.2)      | 89 (91.3)  | 1 (1.2)    | 0.8 (0.15)  | 0.8 (0.15)  | 0.8 (0.15) | 1 (12.2)   | 60 (71.4)  | 11 (13.1)           | 0.4 (02.0)           |          |  |  |  |         |  |  |  |  |                      |  |          |
|                           | Once a week                  | 21 (37.0)           | 80 (63.0)  | 136 (63.0) | 0.7 (83.3) | 180 (83.3) | 36 (16.7) | 0.0 (79.7) | 0.0 (0.0) | 5 (5.6)  | 6 (6.7) | 2 (2.2)      | 198 (91.7) | 3 (1.4)    | 1 (0.5)     | 0.9 (0.94)  | 0.9 (0.94) | 1 (12.5)   | 164 (75.9) | 19 (8.8)            | 0.1 (77.0)           |          |  |  |  |         |  |  |  |  |                      |  |          |
|                           | Over 3 days a week           | 29 (36.4)           | 108 (63.6) | 189 (63.6) | 0.9 (35.8) | 234 (78.2) | 63 (21.2) | 0.9 (99.0) | 0.0 (0.0) | 1 (1.1)  | 4 (4.4) | 3 (3.3)      | 273 (91.9) | 5 (1.7)    | 0.0 (0.0)   | 0.1 (0.22)  | 0.1 (0.22) | 55 (47.47) | 203 (68.4) | 39 (13.1)           | 0.2 (97.0)           |          |  |  |  |         |  |  |  |  |                      |  |          |
| No apply                  | Daily                        | 33 (33.3)           | 22 (66.7)  | 66 (66.7)  | 0.2 (35.1) | 73 (73.0)  | 26 (26.0) | 0.0 (03.0) | 0 (0.0)   | 5 (5.6)  | 7 (7.7) | 2 (2.2)      | 91 (89.8)  | 1 (1.2)    | 0.9 (0.88)  | 0.9 (0.88)  | 0.9 (0.88) | 1 (12.2)   | 236 (71.3) | 47 (14.2)           | 0.3 (04.0)           |          |  |  |  |         |  |  |  |  |                      |  |          |
|                           |                              | 28 (37.3)           | 47 (62.7)  | 64 (62.7)  | 0.9 (01.3) | 85 (85.3)  | 11 (14.7) | 0.1 (93.7) | 0.0 (0.0) | 6 (6.6)  | 3 (3.3) | 89 (89.3)    | 3 (3.3)    | 0.0 (0.02) | 0.0 (0.02)  | 0.0 (0.02)  | 1 (1.3)    | 50 (66.7)  | 12 (16.0)  | 0.2 (48.0)          |                      |          |  |  |  |         |  |  |  |  |                      |  |          |
|                           |                              | 75 (37.3)           | 28 (37.3)  | 47 (62.7)  | 0.9 (01.3) | 85 (85.3)  | 11 (14.7) | 0.1 (93.7) | 0.0 (0.0) | 6 (6.6)  | 7 (7.7) | 3 (3.3)      | 89 (89.3)  | 3 (3.3)    | 0.0 (0.02)  | 0.0 (0.02)  | 0.0 (0.02) | 1 (1.3)    | 50 (66.7)  | 12 (16.0)           | 0.2 (48.0)           |          |  |  |  |         |  |  |  |  |                      |  |          |

|       |          |          |          |          |     |    |         |    |          |    |    |   |   |     |      |     |
|-------|----------|----------|----------|----------|-----|----|---------|----|----------|----|----|---|---|-----|------|-----|
| Total | 33<br>00 | 118<br>8 | 211<br>2 | 259<br>8 | 702 | 18 | 17<br>7 | 24 | 302<br>4 | 45 | 12 | 3 | 9 | 519 | 2343 | 426 |
|-------|----------|----------|----------|----------|-----|----|---------|----|----------|----|----|---|---|-----|------|-----|

**Supplementary file S7.** Risk of long-COVID symptoms lasting more than 6 months according to the number of COVID-19 infections.

|                   |                            | 1 Infection |        | > 1 Infection |        | RR    | Probability | P value | 95% CI               |
|-------------------|----------------------------|-------------|--------|---------------|--------|-------|-------------|---------|----------------------|
|                   |                            | n           | (%)    | n             | (%)    |       |             |         |                      |
| Symptoms duration | < 6 Months ( <i>ref.</i> ) | 576         | 69.6%  | 155           | 56.8%  |       |             |         |                      |
|                   | > 6 Months                 | 251         | 30.4%  | 118           | 43.2%  | 1.296 | 29.6%       | 0.006   | <b>1.076 - 1.560</b> |
|                   | Total                      | 827         | 100.0% | 273           | 100.0% | N/A   |             | N/A     |                      |

RR: relative risk

**Supplementary file S8.** Risk of long-COVID symptoms lasting longer than 12 months according to the number of COVID-19 infections.

|                   |                             | 1 Infection |        | > 1 Infection |        | RR    | Probability | P value | 95% CI                 |
|-------------------|-----------------------------|-------------|--------|---------------|--------|-------|-------------|---------|------------------------|
|                   |                             | n           | (%)    | n             | (%)    |       |             |         |                        |
| Symptoms duration | 1 Month ( <i>ref.</i> )     | 187         | 22.6%  | 37            | 13.6%  | 0.647 | -35.3%      | 0.009   | 0.4658 - 0.8993        |
|                   | 2-3 Months ( <i>ref.</i> )  | 224         | 27.1%  | 73            | 26.7%  | 0.989 | -1.0%       | 0.085   | 0.7830 - 1.2516        |
|                   | 3-11 Months ( <i>ref.</i> ) | 254         | 30.7%  | 87            | 31.9%  | 1.028 | 2.8%        | 0.795   | 0.8318 - 1.2717        |
|                   | > 12 Months                 | 162         | 19.6%  | 76            | 27.8%  | 1.329 | 32.9%       | 0.022   | <b>1.0420 - 1.6962</b> |
|                   | Total                       | 827         | 100.0% | 273           | 100.0% | N/A   |             | N/A     |                        |

RR: relative risk
